# Supplementary material for: A study of differential circRNA and lncRNA expressions in COVID-19-infected peripheral blood
Source: PubMed Central journal article supplement (PMC8041881; doi:10.1038/s41598-021-86134-0), 2021-04-12
Supplement: 41598_2021_86134_MOESM1_ESM.pdf [file 41598_2021_86134_MOESM1_ESM.pdf]

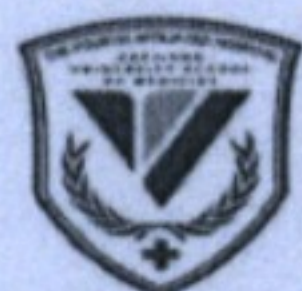

浙江大学医学院  
附属第四医院  
THE FOURTH AFFILIATED HOSPITAL  
ZHEJIANG UNIVERSITY SCHOOL OF MEDICINE

# 浙江大学医学院附属第四医院

## 人体研究伦理委员会

### 临床科研伦理审查批件

批件号 Approval NO.: K20200026

签发日期 Date of issue : 2020/2/19

|                                 |                                                                                                                                                                                                  |                            |         |
|---------------------------------|--------------------------------------------------------------------------------------------------------------------------------------------------------------------------------------------------|----------------------------|---------|
| 项目名称<br>Study Title             | 宏基因组二代测序技术在新型冠状病毒临床检测中的应用                                                                                                                                                                        |                            |         |
| 申办方<br>Sponsor                  | 浙江大学医学院附属第四医院                                                                                                                                                                                    |                            |         |
| 主要研究者<br>Principal Investigator | 夏肖萍                                                                                                                                                                                              | 承担专业<br>Specialty          | 检验科     |
| 审查类别<br>Category of Review      | 初始审查                                                                                                                                                                                             | 审查方式<br>Type of Review     | 快速审查    |
| 审查日期<br>Date of Review          | 2020/2/19                                                                                                                                                                                        | 审查地点<br>Location of Review | 行政楼 311 |
| 审查文件清单<br>Reviewed Items        | 伦理审查申请表、申报书、知情同意书（版本号：GZ-20200217-01）                                                                                                                                                            |                            |         |
| 审评意见<br>Evaluation              | 审查通过。                                                                                                                                                                                            |                            |         |
| 审查决定<br>Decision                | 委员会对该方案的审查决定为： <input checked="" type="checkbox"/> 同意 (Approval)                                                                                                                                 |                            |         |
| 年度/定期跟踪审查<br>Continual Review   | 1.该研究进行过程中将接受伦理委员会的跟踪审查？ <input checked="" type="checkbox"/> 是(Yes) <input type="checkbox"/> 否(No)<br>2.审查频率为该研究批准之日起每 6 月一次，首次请于 2020 年 8 月 19 日前 1 个月递交研究进展报告。<br>3.伦理委员会有根据实际进展情况改变跟踪审查频率的权利。 |                            |         |
| (副)主任签字<br>Chair Signature      |                                                                                                                                                                                                  |                            |         |
| 批准日期<br>Approval Date           | 2020.2.19                                                                                                                                                                                        |                            |         |
| 伦理委员会<br>Stamp of ZJEC          | 浙江大学医学院附属第四医院人体研究伦理委员会(盖章)<br>                                                                                                                                                                   |                            |         |
| 批件有效期<br>Period of Validity     | 此批件的有效期为 3 年, 逾期未实施的, 自行废止。                                                                                                                                                                      |                            |         |
